# Supplementary material for: Graphene oxide modulates dendritic cell ability to promote T cell activation and cytokine production
Source: Royal Society of Chemistry journal article supplement (doi:10.1039/d2nr02169b), 2022-01-01
Supplement: d2nr02169b1.pdf [file d2nr02169b1.pdf]

# Supporting Information

## Supplementary Tables

**Supplementary Table 1.** Physicochemical and biological properties of sGO and LGO flakes.

| Physicochemical properties                     | Technique                               | sGO                                                                             | LGO                                                                             |
|------------------------------------------------|-----------------------------------------|---------------------------------------------------------------------------------|---------------------------------------------------------------------------------|
| Lateral dimension                              | Optical microscopy                      | Non-detectable (< 2 $\mu\text{m}$ )                                             | up to 30 $\mu\text{m}$                                                          |
|                                                | AFM                                     | < 1 $\mu\text{m}$                                                               | 5-20 $\mu\text{m}$                                                              |
|                                                | TEM                                     | 50 nm-3 $\mu\text{m}$                                                           | 0.5-15 $\mu\text{m}$                                                            |
| Thickness                                      | AFM                                     | 1-3 nm                                                                          | 1-2 nm                                                                          |
| Defects Density                                | Raman $I_{\text{D}}/I_{\text{G}}$ ratio | $1.32 \pm 0.05$                                                                 | $1.30 \pm 0.05$                                                                 |
| Surface Charge                                 | $\zeta$ -potential                      | $-55.0 \pm 5 \text{ mV}$                                                        | $-53 \pm 5 \text{ mV}$                                                          |
| Functionalisation degree                       | TGA                                     | 43%                                                                             | 44%                                                                             |
| Chemical composition                           | XPS (at. %)                             | C: $70.3 \pm 1.0$ ; O: $29.4 \pm 1.0$ ; S: $0.2 \pm 0.1$ ; Si: $0.1 \pm 0.1$    | C: $69.1 \pm 1.2$ ; O: $30.5 \pm 1.2$ ; S: $0.4 \pm 0.1$                        |
| Purity                                         | XPS (C at. % + O at. %)                 | 99.7                                                                            | 99.6                                                                            |
| C:O ratio                                      | XPS (C at. % / O at. %)                 | $2.4 \pm 0.1$                                                                   | $2.3 \pm 0.1$                                                                   |
| $\pi$ - $\pi^*$ , O=C-O, C=O, C-O, C-C and C=C | XPS (C1s spectra, C at. %)              | $1.9 \pm 0.6$ , $5.0 \pm 0.9$ , $3.2 \pm 0.5$ , $45.4 \pm 3.0$ , $44.5 \pm 3.0$ | $1.2 \pm 0.2$ , $3.8 \pm 0.3$ , $4.0 \pm 0.4$ , $44.0 \pm 2.0$ , $47.0 \pm 2.0$ |
| <b>Biological properties</b>                   |                                         |                                                                                 |                                                                                 |
| Endotoxin content                              | TNF- $\alpha$ ELISA measurement         | n/a*                                                                            | n/a*                                                                            |

\* See Supplementary Figure 1

**Supplementary Table 2.** Antibodies used to assess DC activation and antigen presentation

| <b>Antibody</b>                        | <b>Fluorophore</b> | <b>Clone</b> | <b>Dilution</b> | <b>Supplier</b> | <b>Cat No.</b> |
|----------------------------------------|--------------------|--------------|-----------------|-----------------|----------------|
| <b>CD86</b>                            | Alexa Fluor 488    | GL-1         | 1:800           | BioLegend       | 105018         |
| <b>CD80</b>                            | PerCP/Cy5.5        | 16-10A1      | 1:600           | BioLegend       | 104722         |
| <b>MHCI (H-2Kb)</b>                    | APC                | AF6-88.5.5.3 | 1:500           | eBioscience     | 17-5958-80     |
| <b>MHCII (I-A/I-E)</b>                 | Alexa Fluor 700    | M5/114.15.2  | 1:1000          | BioLegend       | 107622         |
| <b>CD11c</b>                           | APC/eFluor 780     | N418         | 1:200           | eBioscience     | 47-0114-82     |
| <b>Cellular Amines (Viability Dye)</b> | Zombie UV          | -            | 1:2000          | BioLegend       | 423108         |
| <b>CD40</b>                            | PE                 | 3/23         | 1:200           | BioLegend       | 124610         |
| <b>H-2Kb bound SIINFEKL</b>            | PE                 | 25-D1.16     | 1:200           | BioLegend       | 141603         |
| <b>CD83</b>                            | PE/Cy7             | Michel-19    | 1:300           | BioLegend       | 121518         |

**Supplementary Table 3.** Antibodies used to assess T cell activation

| <b>Antibody/Cell Tracer</b>            | <b>Fluorophore</b> | <b>Clone</b> | <b>Dilution</b> | <b>Supplier</b> | <b>Cat No.</b> |
|----------------------------------------|--------------------|--------------|-----------------|-----------------|----------------|
| <b>CFSE</b>                            | FITC               | -            | -               | Sigma           | 21888          |
| <b>T-bet</b>                           | PerCP/Cy5.5        | 4B10         | 1:100           | BioLegend       | 644806         |
| <b>Foxp3</b>                           | APC                | FJK-16s      | 1:200           | eBioscience     | 17-5773-82     |
| <b>TCR beta</b>                        | APC/eFluor 780     | H57-597      | 1:200           | eBioscience     | 47-5961-82     |
| <b>CD11c</b>                           | BV421              | N418         | 1:200           | BioLegend       | 117330         |
| <b>CD62L</b>                           | BV605              | MEL-14       | 1:200           | BioLegend       | 104437         |
| <b>CD25</b>                            | BV650              | PC61         | 1:100           | BioLegend       | 102038         |
| <b>CD69</b>                            | BV711              | H1.2F3       | 1:200           | BioLegend       | 104537         |
| <b>CD44</b>                            | BV785              | IM7          | 1:400           | BioLegend       | 103059         |
| <b>Cellular Amines (Viability Dye)</b> | Zombie UV          | -            | 1:2000          | BioLegend       | 423108         |
| <b>CD4</b>                             | PE                 | RM 4.5       | 1:400           | eBioscience     | 12-0042-83     |
| <b>CD8</b>                             | PE/Cy7             | 53-6.7       | 1:400           | BioLegend       | 100722         |

## Supplementary Figures

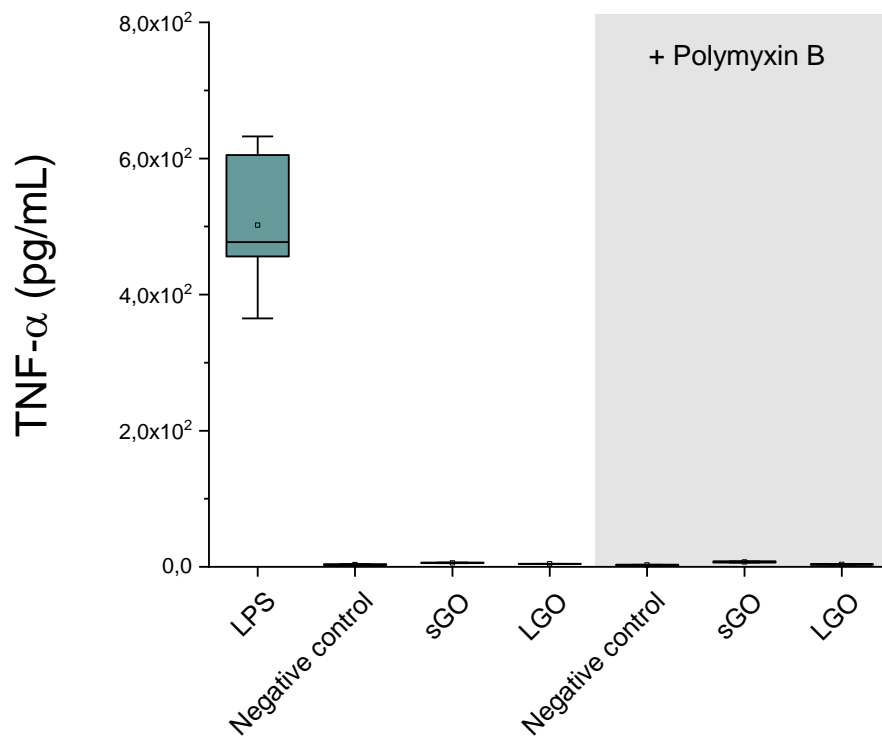

**Supplementary Figure 1. Presence of endotoxins evaluated in bone marrow-derived macrophages by TNF- $\alpha$  ELISA.** Mouse bone marrow-derived macrophages were exposed to non-toxic concentrations of sGO and LGO (50  $\mu$ g/mL) or to cell culture medium. LPS at 100 ng/mL was used as positive control of inflammation. Polymyxin B (10  $\mu$ M) was used as control to inhibit TLR4 dependent secretion of TNF- $\alpha$ . TNF- $\alpha$  concentrations are expressed in pg/mL using mouse TNF- $\alpha$  standard curve.

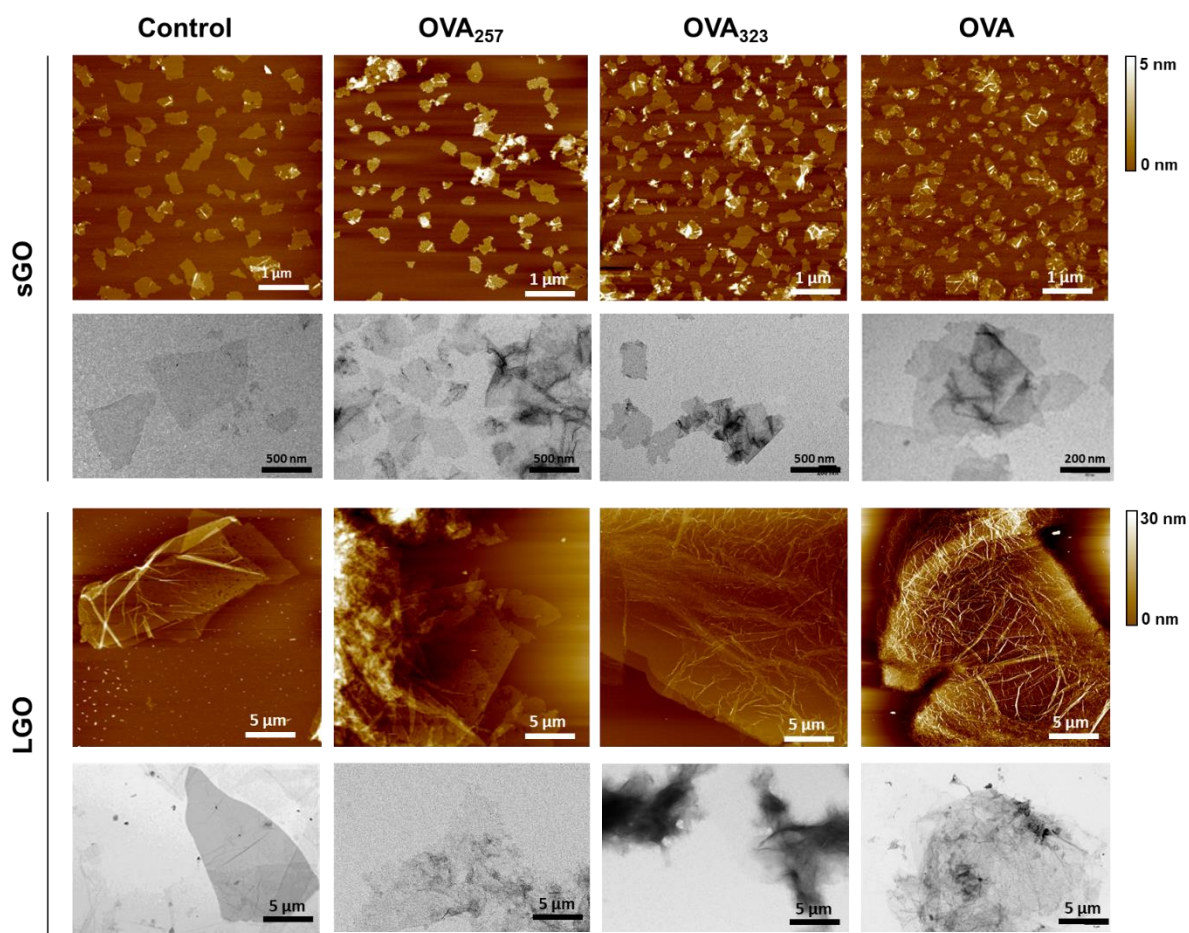

**Supplementary Figure 2. Adsorption of OVA peptides (OVA<sub>257</sub>, OVA<sub>323</sub>) and OVA protein to sGO and LGO.** Height AFM images and TEM micrographs are shown to evidence the formation of the complexes. Higher ratios were used to make the biomolecules visible in the AFM and TEM (1.5 μg of OVA peptides and 50 μg of OVA protein were adsorbed to 5 μg of sGO and LGO).

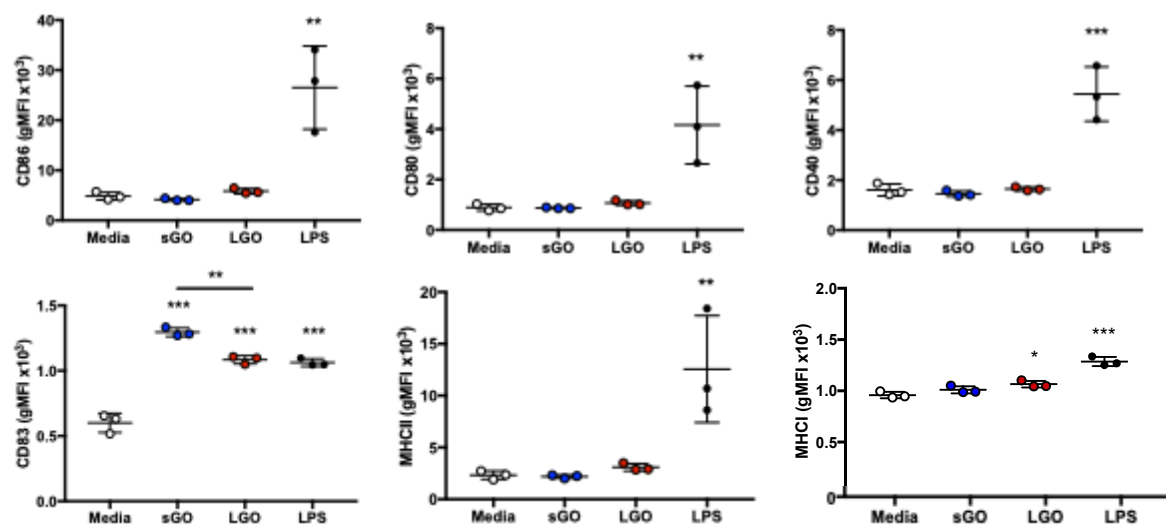

**Supplementary Figure 3. Graphene oxide has minimal effect on expression of costimulatory markers in BMDCs.** gMFI of CD86, CD80, CD40, CD83, MHCII and MHCI as assessed by flow cytometry. Data are presented as mean  $\pm$  STDEV (data is representative of 1 of 3 independent experiments each with 3 intra experimental replicates). Statistical analysis was performed by one-way ANOVA with Bonferroni's *post hoc* test, \* $p < 0.05$ , \*\* $p < 0.01$ , \*\*\* $p < 0.001$  (above bars *versus* control).

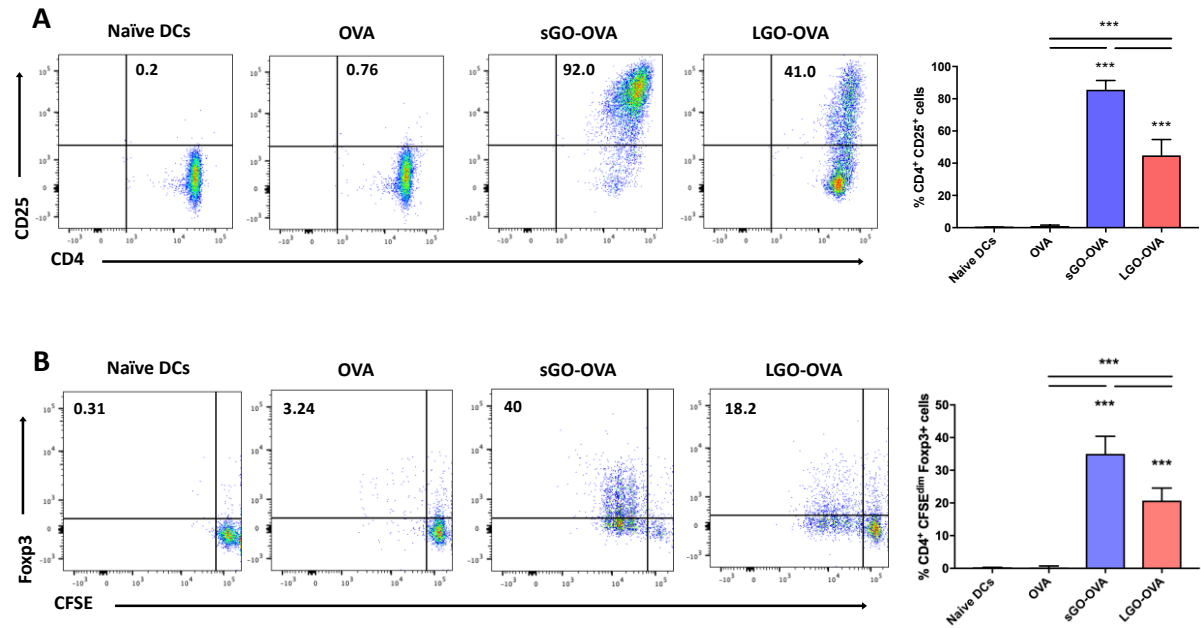

**Supplementary Figure 4. OT-II CD25 and Foxp3 expression flow cytometry.** BMDCs were pulsed for 2h with 10  $\mu$ g OVA protein or GO-OVA complexes (5 $\mu$ g:10 $\mu$ g). BMDCs were then washed and co-cultured with CFSE labelled OT-II CD4<sup>+</sup> T cells for 72h. (A) The % of CD4<sup>+</sup> T cells expressing CD25 was analysed via flow cytometry. (B) The % of CD4<sup>+</sup> CFSE<sup>dim</sup> dividing T cells expressing Foxp3 was analysed via flow cytometry. Data are presented as mean  $\pm$  STDEV (data is representative of 1 of 3 independent experiments each with 3 intra experimental replicates). Statistical analysis was performed by one-way ANOVA with Bonferroni's *post hoc* test. \*\*\* $p < 0.001$  (above bars *versus* OVA alone control).

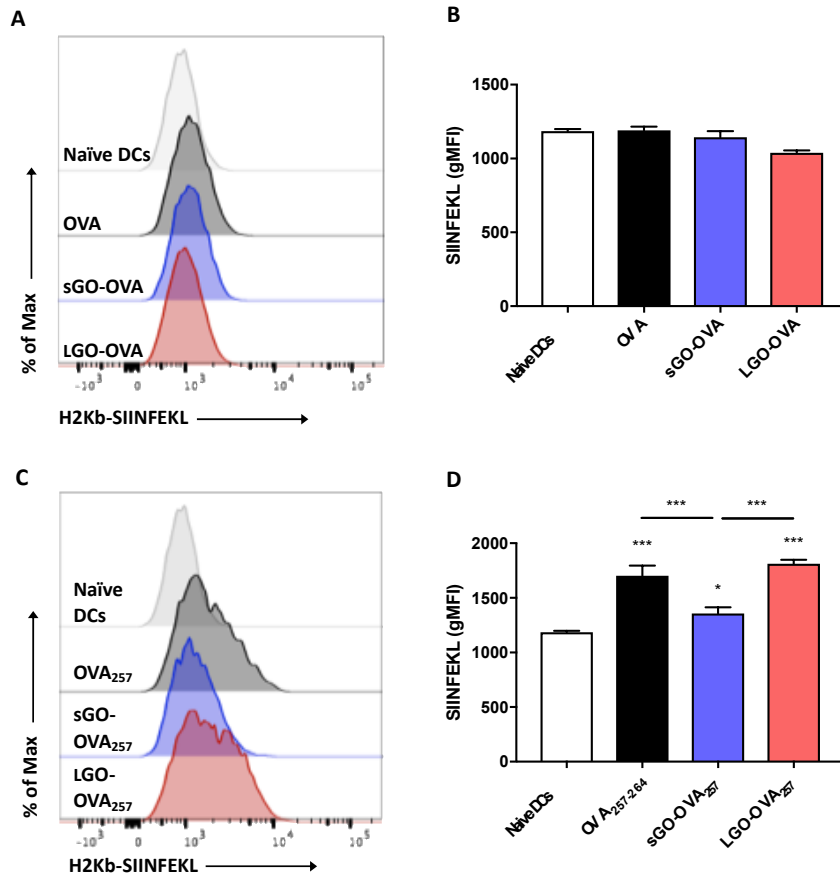

**Supplementary Figure 5. OT-I antigen presentation on MHCI.** (A, B) BMDCs were pulsed for 18 hours with 10  $\mu$ g OVA protein or GO-OVA complexes (5 $\mu$ g:10 $\mu$ g) and the presentation of MHCI-bound SIINFEKL was assessed by flow cytometry. (C, D) BMDCs were pulsed for 18 hours with 5 ng OVA peptide (257-264) or GO-OVA peptide complexes (5 $\mu$ g:5ng) and the presentation of MHCI-bound SIINFEKL was assessed by flow cytometry. Data are presented as mean + STDEV (data is representative of 1 of 3 independent experiments each with 3 intra experimental replicates). Statistical analysis was performed by one-way ANOVA with Bonferroni's *post hoc* test. \* $P < 0.05$ , \*\*\* $p < 0.001$  (above bars versus naïve DCs).



## Supplementary Videos

**Video S1.** Naïve DCs were imaged using a confocal microscope. DC plasma membranes were stained with CellMask Red plasma membrane stain (excitation at 633 nm/ emission max at 665 nm).

**Video S2.** Processing of OVA<sub>DQ</sub> (488/520 nm, green) was imaged using a confocal microscope. DC plasma membranes were stained with CellMask Red plasma membrane stain (excitation at 633 nm/ emission max at 665 nm).

**Video S3.** Processing of sGO-OVA<sub>DQ</sub> (488/520 nm, green) was imaged using a confocal microscope. DC plasma membranes were stained with CellMask Red plasma membrane stain (excitation at 633 nm/ emission max at 665 nm).

**Video S4.** Processing of LGO-OVA<sub>DQ</sub> (488/520 nm, green) was imaged using a confocal microscope. DC plasma membranes were stained with CellMask Red plasma membrane stain (excitation at 633 nm/ emission max at 665 nm).
